# Supplementary material for: A new building block for DNA network formation by self-assembly and polymerase chain reaction
Source: publisher site journal article supplement (doi:10.3762/bjoc.10.104), 2014-05-07
Supplement: Additional file 1 [file 1860-5397-10-104-S1.pdf]

# Supporting Information

for

## A new building block for DNA network formation by self-assembly and polymerase chain reaction

Holger Bußkamp<sup>‡</sup>, Sascha Keller<sup>‡</sup>, Marta Robotta, Malte Drescher and Andreas Marx<sup>\*§</sup>

Address: Department of Chemistry and Konstanz Research School Chemical Biology, University of  
Konstanz, Universitätsstraße 10, 78457 Konstanz, Germany

Email: Andreas Marx - [Andreas.Marx@uni-konstanz.de](mailto:Andreas.Marx@uni-konstanz.de)

\*Corresponding author

§Tel. +49-7531-88 5139; Fax. +49- 7531-88 5140;

‡contributed equally

### Experimental part

#### Table of contents

|                                                                                          |    |
|------------------------------------------------------------------------------------------|----|
| 1) General .....                                                                         | S2 |
| 2) Synthesis DNA branching building block.....                                           | S3 |
| 3) Synthesis of oligonucleotides .....                                                   | S6 |
| 3) Characterization of duplex formation.....                                             | S7 |
| 4) Determination of melting characteristics of self complementary oligonucleotides ..... | S9 |
| 5) Characterization of DNA networks .....                                                | S9 |

**1) General.** Chemicals for synthesis of the DNA-branching building blocks were purchased from Acros, Aldrich, Sigma, or Fluka (Sigma-Aldrich, Germany). Solvents were of laboratory grade. Thin-layer chromatography (TLC) was performed on TLC aluminium sheets covered with silica gel 60 F254 (0.2 mm, Merck, Germany). Column flash chromatography (FC): silica gel 60 (Merck, Germany) at 0.3 bar. Microwave assisted reactions were performed on an Initiator EXP EU (Biotage, Sweden). ESI-IT mass spectra were recorded on a Bruker Daltonics esquire 3000plus. High-Resolution ESI-TOF mass spectra were recorded by using a micrOTOF II (Bruker Daltonics). NMR spectra were recorded at 298 K using Avance 400 ( $^1\text{H} = 400$  MHz, Bruker, Germany) and on an Avance 600 ( $^1\text{H} = 600$  MHz, Bruker, Germany).  $J$  values are given in Hz;  $\delta$  values in ppm relative to  $\text{Me}_4\text{Si}$  as internal standard, or 85%  $\text{H}_3\text{PO}_4$  for  $^{31}\text{P}$ . DNA oligonucleotides were synthesized on an Applied-Biosystem 392 DNA/RNA synthesizer or purchased from Ella Biotech (Germany). Chemicals and solid support for DNA synthesis were purchased from AzcoBiotech (USA), J.T. Baker (Netherlands) and Link-Technologies (Scotland, UK). Reversed-phase HPLC was performed using a Prominence HPLC (Shimadzu, Japan) instrument equipped with a Nucleosil-100-5 C18 column ( $250 \times 4$  mm, Macharey-Nagel, Germany). Thermal denaturation studies were performed using a Cary-100 Bio UV-vis spectrophotometer (Varian, Australia) equipped with a Cary Thermo-controller using a heating rate of  $1\text{ }^\circ\text{C}\cdot\text{min}^{-1}$ . CD spectra were recorded on a Jasco 715 instrument (Jasco Inc., Easton Maryland). DLS measurements were performed using a Nano ZS (Malvern Instruments) instrument. PCR was performed using a PCR-Thermocycler system (BIOMETRA) and dNTPs were purchased from Fermentas.

QIAquick Gel Extraction Kit and MinElute Reaction Cleanup Kit were from Qiagen. Agarose-gels were photographed using ChemiDoc XRS from BioRad. AFM images were acquired on a NanoWizard II (JPK Instruments, Germany) using high-grade Mica ( $1 \times 1''$ , TED Pella, USA) and cantilevers from APPNano (CA, USA) and Nanoworld (Switzerland).

## 2) Synthesis DNA branching building block.

### 1-((2*R*,4*S*,5*R*)-5-((3,5-dibromophenyl)ethynyl)-4-hydroxytetrahydrofuran-2-yl)-5-thymidine (**3**)

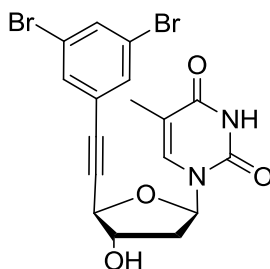

In an inert atmosphere,  $\text{NEt}_3$  (2 mL) was added to a stirred solution of **2** (0.43 g, 1.81 mmol), 1-iodo-3,5-dibromobenzene (**1**, 0.69 g, 1.90 mmol),  $(\text{PPh}_3)_2\text{PdCl}_2$  (24.4 mg, 0.036 mmol) and  $\text{CuI}$  (13.8 mg, 0.072 mmol) in DMF (2 mL). The resulting solution was heated with a microwave (max. 350 W) for 15 min at 55 °C. The solvent was removed in vacuo and the remaining solid was purified by silica-gel column chromatography (1–5% MeOH/ $\text{CH}_2\text{Cl}_2$ ) to yield **3** as a yellowish solid (0.68 g, 80%).  $R_f$  0.51 ( $\text{CH}_2\text{Cl}_2$ /MeOH 10:1);  $^1\text{H}$  NMR (400 MHz,  $\text{DMSO}-d_6$ )  $\delta$  11.38 (s, 1H, N-H), 7.93 (t,  $J = 1.7$  Hz, 1H, p-arom.), 7.78 (d,  $J = 1.7$  Hz, 2H, o-arom.), 7.56 (s, 1H,  $\text{H}_6$ ), 6.34 (dd,  $J = 7.8, 6.6$  Hz, 1H,  $\text{H}_{1'}$ ), 4.74 (s, 1H,  $\text{H}_{4'}$ ), 4.51 (s, 1H,  $\text{H}_{3'}$ ), 2.37 – 1.97 (m, 2H,  $\text{H}_{2'}$ ), 1.70 (s, 3H,  $\text{CH}_3$ , thymidine).  $^{13}\text{C}$  NMR (101 MHz,  $\text{DMSO}-d_6$ )  $\delta$  163.60, 150.56, 135.97, 134.3, 133.06, 125.05, 122.56, 109.59, 89.60, 85.42, 84.41, 76.21, 75.74, 38.17, 12.23. MS ( $\text{ESI}^+$ )  $m/z$  (calcd) 470.9 ( $[\text{M}+\text{H}]^+$ , 100%),  $m/z$  (found) 470.5; HRMS- $\text{ESI}^+$   $m/z$  (calcd for  $\text{C}_{17}\text{H}_{14}\text{Br}_2\text{N}_2\text{O}_4$   $[\text{M}+\text{H}]^+$ ) 470.9374,  $m/z$  (found) 470.9352.

## Compound 5

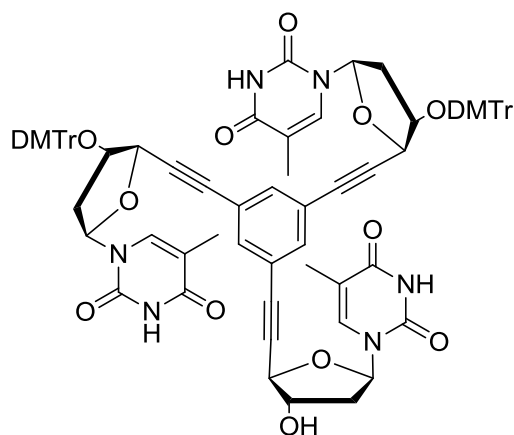

In an inert atmosphere,  $\text{NEt}_3$  (1.6 mL) was added to a stirred solution of **4** (0.64 g, 1.20 mmol), **3** (0.27 g, 0.58 mmol),  $(\text{PPh}_3)_2\text{PdCl}_2$  (8.1 mg, 0.012 mmol), and  $\text{CuI}$  (2.2 mg, 0.012 mmol), in DMF (3 mL). The resulting solution was heated within a microwave (max. 350 W) for 80 min at 80 °C. The solvent was removed in vacuo and the remaining solid was purified by silica-gel column chromatography (1–5%  $\text{MeOH}/\text{CH}_2\text{Cl}_2$ ) to yield **5** (0.35 mg, 44%) after recrystallization in hexane as yellowish powder.  $R_f$  0.26 ( $\text{CH}_2\text{Cl}_2/\text{MeOH}$  95:5). For NMR signal nomenclature 3'-OH moiety containing signals are called A and 3'-DMTr moiety containing signals are called B.  $^1\text{H}$  NMR (400 MHz, acetone- $d_6$ )  $\delta$  7.59 – 7.20 (m, 24H, overlapping signals  $\text{H}_{6\text{A,B}}$ ,  $\text{H}_{\text{arom. core}}$ ,  $\text{H}_{\text{DMTr}}$ ), 6.88 (dd,  $J = 9.0, 3.1$  Hz, 8H,  $\text{H}_{\text{ortho to MeO}}$ ), 6.53 – 6.44 (overlapping signal: 6.49 (dd,  $J = 8.1, 6.4$  Hz, 2H,  $\text{H}_{1'\text{A}}$ ); 6.47 (dd,  $J = 7.9, 6.3$  Hz, 1H,  $\text{H}_{1'\text{B}}$ )), 4.89 (s, 1H,  $\text{H}_{4'\text{A}}$ ), 4.66 (d,  $J = 4.5$  Hz, 1H,  $\text{H}_{3'\text{A}}$ ), 4.54 (d,  $J = 5.1$  Hz, 2H,  $\text{H}_{3'\text{B}}$ ), 4.12 (s, 2H,  $\text{H}_{4'\text{B}}$ ), 3.78 (s, 6H,  $\text{H}_{\text{MeO}}$ ), 3.77 (s, 6H,  $\text{H}_{\text{MeO}}$ ), 2.52 – 2.32 (m, 4H,  $\text{H}_{2'\text{B}}$ ), 2.25 – 2.15 (m, 2H,  $\text{H}_{2'\text{A}}$ ), 1.70 (s, 3H,  $\text{CH}_3_{\text{thymidine, A}}$ ), 1.68 (s, 6H,  $\text{CH}_3_{\text{thymidine, B}}$ ).  $^{13}\text{C}$  NMR (101 MHz, acetone- $d_6$ )  $\delta$  164.41, 159.94, 151.39, 145.92, 136.63, 136.59, 136.55, 136.38, 135.37, 135.27, 131.14, 131.11, 129.04, 128.95, 128.02, 124.08, 124.01, 114.35, 114.33, 111.14, 111.12, 88.91, 88.63, 87.43, 87.30, 86.35, 80.25, 77.90, 77.38, 75.93, 40.25, 39.28, 13.14, 13.07. MS (ESI $^-$ )  $m/z$  (calcd) 1419.5 ( $[\text{M}+\text{Cl}]^-$ , 100%),  $m/z$  (found) 1419.4; HRMS-ESI  $m/z$  (calcd for  $\text{C}_{81}\text{H}_{72}\text{N}_6\text{O}_{16}$   $[\text{M}-\text{H}]^-$ ) 1383.4921,  $m/z$  (found) 1383.4920.

## Compound 6

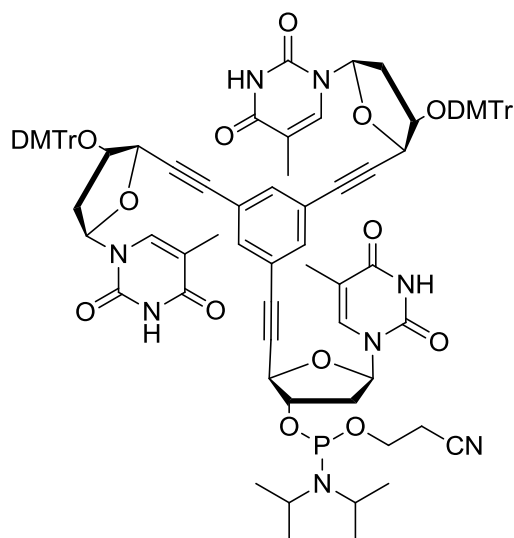

Compound **5** (244 mg, 0.18 mmol) was dissolved in dry CH<sub>2</sub>Cl<sub>2</sub> and reacted with *N*-diisopropyl-2-cyanoethyl-chlorophosphoramidite (87 μL, 0.36 mmol) in the presence of diisopropylethylamine (245 μL, 1.4 mmol) at room temperature. The reaction mixture was stirred for 6 h under argon atmosphere. The mixture was poured into saturated Na<sub>2</sub>CO<sub>3</sub> solution and washed with water (2×) and brine (2×). The organic layers were combined and dried over MgSO<sub>4</sub>. After evaporation, the product was recrystallized from hexane to give **6** (240 mg, 84%) as white needles.  $R_f$  0.37 (CH<sub>2</sub>Cl<sub>2</sub>/MeOH 95:5); MS (ESI<sup>+</sup>)  $m/z$  (calcd) 1585.6 ([M+H]<sup>+</sup>, 100%),  $m/z$  (found) 1585.3; <sup>31</sup>P NMR (162 MHz, acetone-*d*<sub>6</sub>) δ 149.76, 149.31. HRMS-ESI<sup>+</sup>  $m/z$  (calcd for C<sub>90</sub>H<sub>89</sub>N<sub>8</sub>O<sub>17</sub> [M+Na<sup>+</sup>]<sup>+</sup>) 1607.5976,  $m/z$  (found) 1607.5910.

### 3) Synthesis of oligonucleotides

The DNA oligonucleotide synthesis was performed on an ABI 392-DNA/RNA-synthesizer (Applied Biosystem) at a 0.2  $\mu\text{mol}$  scale (trityl-on mode) employing the standard phosphoramidites and building block **6** which was diluted in 10%  $\text{CH}_2\text{Cl}_2$  in  $\text{CH}_3\text{CN}$  to a final concentration of 0.12 M. The synthesis was performed 3000 Å LCAA-CPG support. The average coupling yields were always higher than 95% by using a coupling time of 5 min for reaction with **6**. After cleavage from the solid-support, the oligonucleotides were deprotected in 33% aq  $\text{NH}_3$  for 16 h at 60 °C. The DMT-containing oligonucleotides were purified by reversed-phase HPLC (RP-18) with the following solvent gradient system [A: 0.1 M  $(\text{Et}_3\text{NH})\text{OAc}$  (pH 7.0)/ $\text{CH}_3\text{CN}$  95:5; B:  $\text{CH}_3\text{CN}$ ; gradient *I*: 0–3 min 10–15% B in A, 3–15 min 15–50% B in A, 15–20 min 50–10% B in A, flow rate 2  $\text{mL}\cdot\text{min}^{-1}$ ]. Then, the mixture was evaporated to dryness, and the residue was treated with 80% acetic acid for 30 min at 25 °C to remove the 4,4'-dimethoxytrityl residues. The detritylated oligomers were purified by reversed-phase HPLC with the gradient *II*: 0–20 min 5–20% B in A, 20–25 min 70% B in A, 25–30 min 70–5% B in A, flow rate 2  $\text{mL}\cdot\text{min}^{-1}$ . The oligonucleotides were lyophilized on a Speed Vac evaporator to yield colourless solids which were stored frozen at  $-20^\circ\text{C}$ .

ESI-MS analysis of synthesized branched oligonucleotides:

|             |                        |                        |
|-------------|------------------------|------------------------|
| ODN-sc-I:   | $m/z$ (calcd.) 2634.5  | $m/z$ (found): 2634.5  |
| ODN-sc-II:  | $m/z$ (calcd.) 4482.9  | $m/z$ (found): 4482.9  |
| ODN-sc-III: | $m/z$ (calcd.) 4488.8  | $m/z$ (found): 4488.8  |
| ODN-sc-IV:  | $m/z$ (calcd.) 6340.1  | $m/z$ (found): 6340.1  |
| ODN I:      | $m/z$ (calcd.) 16047.4 | $m/z$ (found): 16046.4 |
| ODN II:     | $m/z$ (calcd.) 16569.5 | $m/z$ (found): 16569.3 |

### 3) Characterization of duplex formation

**Thermal denaturation** curves were measured with a Cary-100 Bio UV–vis spectrophotometer (Varian, Australia) equipped with a Cary thermo-controller using a heating rate of  $1\text{ }^{\circ}\text{C}\cdot\text{min}^{-1}$  in a buffer containing  $\text{KH}_2\text{PO}_4$  (20 mM, pH 7.0) and NaCl (200 mM) at room temperature. The samples contained  $2\text{ }\mu\text{M}$  duplex DNA.

Corresponding to **Table 1**: Thermal denaturation spectra showing branched oligomer duplexes A: **8 + ODN I**; B: **9 + ODN I**; C: **10 + ODN I**; D: **11 + ODN I**.

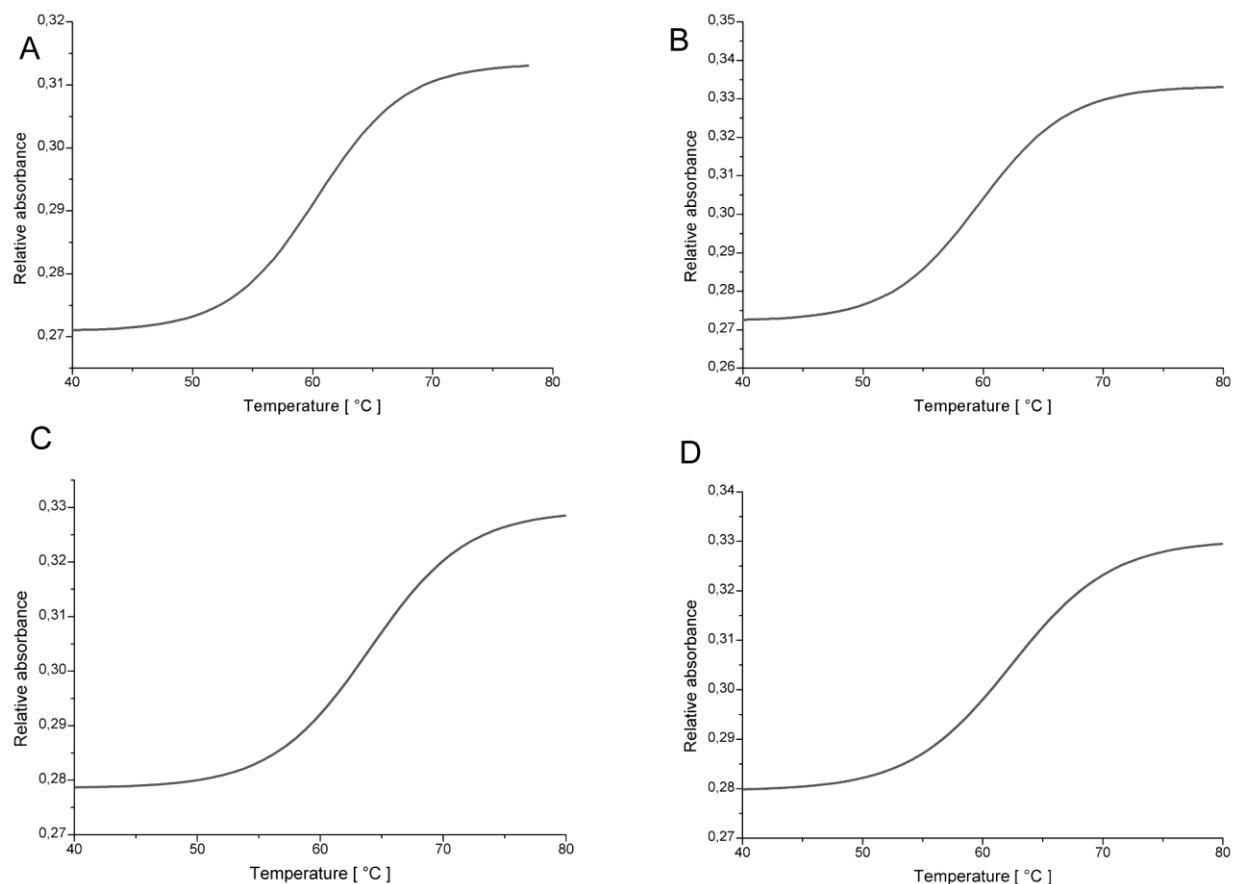

**Figure S1:** Thermal denaturation curves of DNA duplexes A, B, C, D, respectively.

## USED OLIGOnucleotides:

- 7 5'-TCACCATCACCATCACCA
- 8 5'-TGGTGATGGTGATGGT
- 9 5'-TGGTGATGGTGATGGTG
- 10 5'-TGGTGATGGTGATGGTGA
- 11 5'-TGGTGATGGTGATGGTGAC

### Corresponding CD spectra to thermal denaturation experiments A – D

**Circular dichroism** (CD) spectra were recorded on a Jasco 715 instrument (Jasco Inc., Easton Maryland) in a buffer containing  $\text{KH}_2\text{PO}_4$  (20 mM, pH 7.0) and NaCl (200 mM) at room temperature. The samples contained 2  $\mu\text{M}$  duplex DNA for the linear DNA motives. In the case of branched DNA motives linear DNA oligomers were used 6  $\mu\text{M}$  and branched DNA motives 2  $\mu\text{M}$  to saturate all three arms of branching DNA motive. All mixtures were heated to 95 °C for 5 min and allowed to cool slowly to room temperature prior to measurements. A spectrum of the buffer was measured separately and subtracted from the spectra resulting from the samples. An average of 10 spectra was recorded in each experiment.

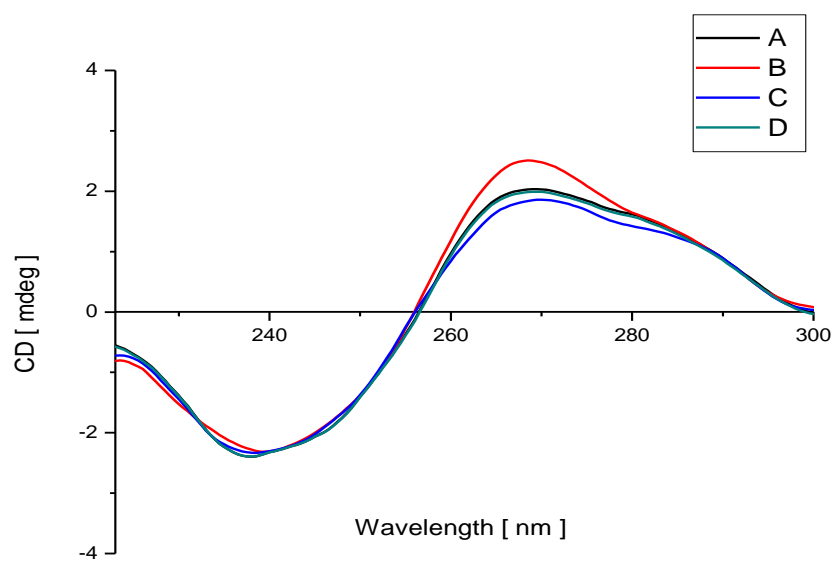

**Figure S2:** CD-spectra of DNA duplexes A, B, C, D, respectively.



#### 4) Determination of melting characteristics of self complementary oligonucleotides

5  $\mu$ M self-complementary oligonucleotides were dissolved in either 0.1 M triethylammonium acetate buffer (pH 7), or 0.1 M triethylammonium acetate buffer (pH 7), 150 mM NaCl or 0.1 M triethylammonium acetate buffer (pH 7), 150 mM NaCl and 100 mM MgCl<sub>2</sub>. The corresponding linear controls were dissolved in the same buffers at a final concentration of 15  $\mu$ M. The thermal denaturation curves were determined as described above.

#### 5) Characterization of DNA networks

PCR was performed using a PCR-Thermocycler system (BIOMETRA). The reactions were performed containing 4 nM of the respective templates, 0.5 U of *Taq* DNA polymerase (Fermentas), 1 $\times$  *Taq*-reaction buffer (75 mM TrisHCl (pH 8.8), 20 mM KCl and 0.01% Tween), 3 mM MgCl<sub>2</sub> and water were mixed in an overall volume of 20  $\mu$ L.

The final mixtures contained dNTPs (200  $\mu$ M each of dATP, dGTP, dCTP, and TTP), primers (0.5  $\mu$ M each of the respective primer probe and reverse primer), 0.5 U *Taq* DNA polymerase (Fermentas; units defined by the supplier). PCR amplifications were performed by employing the following program: Initial denaturation at 95 °C for 3 min, followed by cycles of denaturation at 95 °C for 30 s, primer annealing at varying temperatures for 90 s, and extension at 72 °C for 60 s.

#### 1062nt template sequence used in PCR:

pGDR11: pol Beta encoding Sequence ORF

5' –

```
CACCATCACCATCACCATACGGATCCGATGAGCAAACGTAAAGCGCCGCAGGAAACCCTGAACGGCGGC
ATTACCGATATGCTGACCGAACTGGCCAACCTTTGAAAAAACGTGAGCCAGGCGATCCATAAATATAAC
GCGTATCGTAAAGCGGCGAGCGTGATTGCGAAATATCCGCACAAAATTAAGCGGTGCGGAAGCGAAA
AACTGCCGGGCGTGGGCACCAAATTTGCGGAAAAAATCGATGAATTTCTGGCCACCGGCAAACTGCGT
AACTGGAAAAAATTCGCCAGGATGATACCAGCAGCAGCATTAACTTTCTGACCCGTGTGAGCGGCATT
GGTCCGAGCGCGGCGCGTAAATTTGTGGATGAAGGCATCAAACCCTGGAGGATCTGCGTAAAAACGAA
GATAAACTGAACCATCATCAGCGTATTGGCCTGAAATATTTTGGCGATTTTCGAAAAACGTATTCGCGT
GAAGAAATGCTGCAGATGCAGGATATTGTGCTGAACGAAGTGAAAAAGTGGATAGCGAATATATTGCG
ACCGTGTGCGGCAGCTTTTCGTGCTGGCGCGGAAAGCAGCGGCGATATGGATGTGCTGCTGACCCATCCG
AGCTTTACCAGCGAAAGCACCAAACAGCCGAAACTGCTGCATCAGGTGGTGGAAACAGCTGCAGAAAGTG
CATTTTATTACCGATAACCTGAGCAAAGGCGAAACCAAATTTATGGGCGTGTGCCAGCTGCCGAGCAA
AACGATGAAAAAGAATATCCGCATCGCCGTATTGATATTCGTCTGATCCCGAAAGATCAGTATTATTGC
GGCGTGTGTATTTTACCGGCAGCGATATCTTCAACAAAACATGCGTGCGCATGCGCTGGAAAAAGGC
```

TTTACCATCAACGAATACACCATTTCGTCCGCTGGGCGTGACCGGTGTTGCGGGTGAACCGCTGCCGGTG  
GATAGCGAAAAAGATATCTTCGATTACATCCAGTGGAAATATCGTGAACCGAAAGATCGTAGCGAATAA  
GTCGACCTGCAGCCAAGCTTAATTAGC-3'

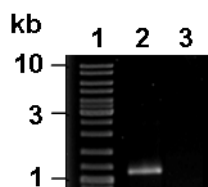

**Figure S3:** Agarose gel electrophoresis analysis of PCR. Lane 1: DNA ladder, Lane 2 PCR with non-branched primers, annealing temperature of 55 °C, 28 cycles; Lane 3: PCR with branched primers without template, annealing temperature of 55 °C, 28 cycles.

#### **AFM:**

The original sample solutions were diluted to  $10 \text{ ng} \cdot \mu\text{L}^{-1}$  for AFM measurements with buffer (10 mM Tris pH 7.4, 1 mM  $\text{NiCl}_2$ ). Freshly cleaved Mica ( $1 \times 1''$ , TED Pella, USA) was incubated with 50  $\mu\text{L}$  of the same buffer for 5 min, washed with 200  $\mu\text{L}$  de-ionized water and dried under steam of nitrogen. 20  $\mu\text{L}$  of the sample containing solution was dropped on Mica and handled after 5 min incubation time in the mentioned way. The mica sheet was then mounted in the AFM. Images were recorded in air using a commercial AFM (NanoWizard II (JPK Instruments, Germany)). Silicon cantilevers (ACTA-Probe, APPNano, California, 125  $\mu\text{m}$  long, 35  $\mu\text{m}$  wide, 4.5  $\mu\text{m}$  thick) with a pyramidal shaped tip (spring constant of  $40 \text{ Nm}^{-1}$  and a resonance frequency of 300 kHz in air) were used.

In air, we selected a driving frequency around 300 kHz for imaging. AFM images ( $512 \times 512$  pixels) were recorded at a scan rate of 1 Hz. Images were processed by flattening to remove the background slope. Thereby JPK SPM Image Processing Software Version 3.3.25 was used.

## Cross section of DNA networks

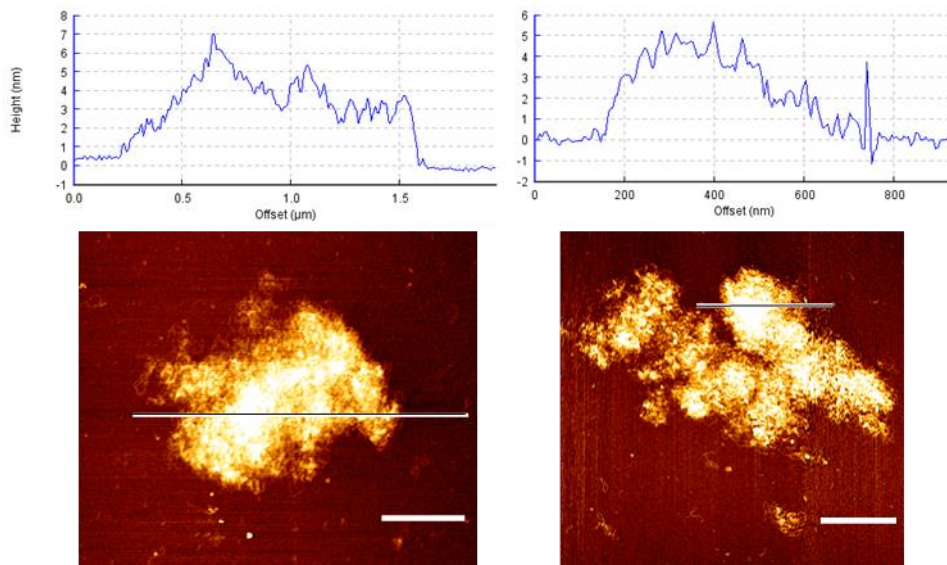

**Figure S4:** Cross section of two DNA networks, bar is 0.5  $\mu\text{m}$ .

**Dynamic Light Scattering (DLS)** measurements were performed on a commercially available Nano ZS (Malvern Instruments) using PCR product of DNA containing samples. Note: The same PCR sample was prepared and mounted on the AFM.

- A)** Linear: particle size 10.8 nm, polarization 90°, 10 measurements in 60 sec at 25 °C,  
100 µL PCR mixture

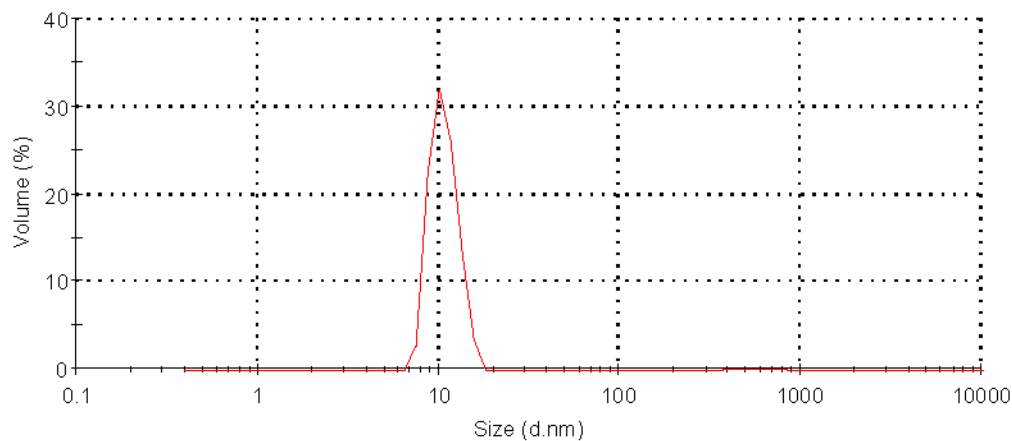

**Figure S5:** DLS of 100 µL PCR mixture using non-branched primers.

- B)** Y-shaped DNA construct: particle size 67 nm and 587 nm, polarization 90°, 10 measurements in 60 sec at 25 °C, 100 µL PCR mixture

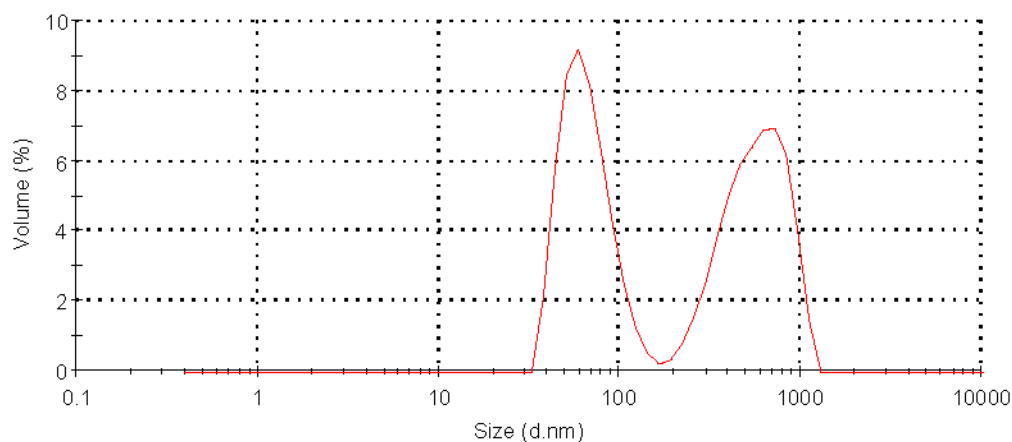

**Figure S6:** DLS of 100 µL PCR mixture using **ODN I** and **ODN II**.

## Sample preparation for EPR Experiments

The modified Triphosphate dT\*TP was synthesized as described in:

Obeid, S.; Yulikov, M.; Jeschke, G.; Marx, A. *Angew. Chem. Int. Ed.* **2008**, *47*, 6782-6785.

In the following PCR reactions a triethylammonium salt of dT\*TP was used:

PCR was performed using a PCR-Thermocycler system (BIOMETRA). The reactions were performed containing 4 nM of the 1062 bp templates, 0.5 U of *Taq* DNA polymerase (Fermentas), 1× *Taq*-reaction buffer (75 mM TrisHCl (pH 8.8), 20 mM KCl and 0.01% Tween), 3 mM MgCl<sub>2</sub> and water were mixed in an overall volume of 25 μL. The final mixtures contained dNTPs (200 μM each of dATP, dGTP, dCTP and indicated ratios of dTTP to dT\*TP), primers (0.5 μM each of the respective primer probe and reverse primer), 0.5 U *Taq* DNA polymerase (Fermentas; units defined by the supplier). PCR amplifications were performed by employing the following program: initial denaturation at 95 °C for 3 min, followed by 30 cycles of denaturation at 95 °C for 30 s, primer annealing at 60 °C for 90 s and extension at 72 °C for 60 s. PCR samples were purified using the following ethanol precipitation protocol: 25 μL PCR reaction mixture was mixed with 12.5 μL NH<sub>4</sub>Ac (pH 5.5, 7.5 M) and 65 μL cooled, absolute EtOH. Mixture was stored at -20°C for 30 min and centrifuged at 13000 rpm at 4 °C for 30 min. The recovered DNA pellet was washed gently twice with cold 70% EtOH and the centrifuge step was repeated for each washing step. The recovered DNA was air dried and dissolved in 10 mM Tris-HCl (pH 8.5).

## PCR using dT\*TP

### A) PCR with 1062 bp long template and linear primers

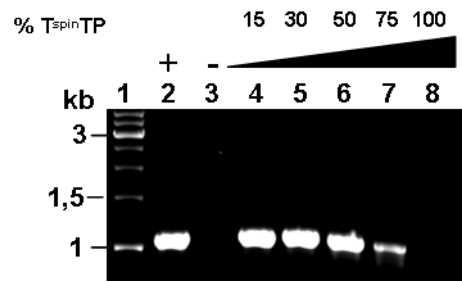

**Figure S7:** An PCR with linear primers and 1062 bp template using different ratios of dT\*TP/dTTP: Lane 1: Ladder Generuler 1kb (Fermantas); Lane 2: PCR with all natural dNTPs; Lane 3: PCR with dATP, dGTP, dCTP; Lane 4, 5, 6, 7, 8: PCR with dATP, dGTP, dCTP and increasing ratios of dT\*TP (15, 30, 50, 75, and 100 % of dT\*TP, respectively).

### B) PCR with branched primers **ODN I** and **ODN II** and 1062 bp template using different ratios of dT\*TP/dTTP

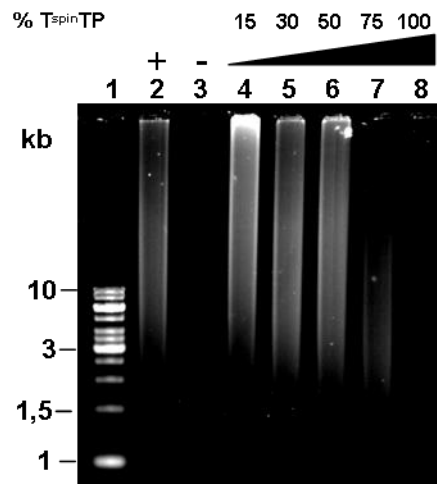

**Figure S8:** PCR with branched primers **ODN I** and **ODN II** and 1062 bp template using different ratios of dT\*TP/dTTP: Lane 1: Ladder Generuler 1kb (Fermantas); Lane 2: PCR with all natural dNTPs, Lane 3: PCR with dATP, dGTP, dCTP; Lane 4, 5, 6, 7, 8: PCR with dATP, dGTP, dCTP and increasing ratios of dT\*TP (15, 30, 50, 75, and 100 % of dT\*TP, respectively).

## **EPR measurements**

All spectra were recorded at  $T = 25$  °C using a Bruker Elexsys E580 X-band spectrometer fitted with an Elexsys Super High Sensitivity Probehead (Bruker BioSpin GmbH) and a temperature controller (ITC503S, Oxford Instruments). Samples were loaded into glass capillaries (outer diameter 1 mm), with typical sample volumes of 10  $\mu$ L. Performing field sweeps containing 4096 data points (in case of spectra from DNA networks 1024 data points) a modulation frequency of 100 kHz was used. Spectra were obtained with modulation amplitude of 0.4 G, microwave attenuation 20 dB, a sweep width of 80 G, and an accumulation time of 2 h.

In order to simulate the spectra, Matlab R2007b (The MathWorks, Inc., 3 Apple Hill Drive, Natick, MA 01760-2098, USA) and the toolbox EasySpin 3.1.6 were used. Varying simulation parameters, least-square-fits to experimental data were performed. For the simulations described in the present work  $A_{xx} = A_{yy} = 18.3$  MHz,  $A_{zz} = 98.5$  MHz and  $g = [g_x \ g_y \ g_z] = [2.009 \ 2.006 \ 2.0024]$  were chosen. Error margins were determined by manually changing the parameters and to test in which range acceptable simulations of the data were obtained.

**Table S1:** Rotational correlation times as derived by spectral simulations of the EPR data.

|                                                                                                                    | $\tau_{\text{corr}}$ [ns]    |                              |
|--------------------------------------------------------------------------------------------------------------------|------------------------------|------------------------------|
| <b>dT*TP</b>                                                                                                       | $0.09 \pm 0.01$              |                              |
| PCR product resulting from non-branched primers in the presence of 50% dT*TP                                       | $0.15 \pm 0.02$              |                              |
|                                                                                                                    | $\tau_{\text{corr}(1)}$ [ns] | $\tau_{\text{corr}(2)}$ [ns] |
| DNA networks generated by PCR in the presence of 50% dT*TP using branched primer as well as corresponding fraction | $0.17 \pm 0.02$<br>8%        | $11.2 \pm 0.3$<br>92%        |
